# Supplementary material for: The composition and functional protein subsystems of the human nasal microbiome in granulomatosis with polyangiitis: a pilot study
Source: Microbiome. 2019 Oct 22;7:137. doi: 10.1186/s40168-019-0753-z (PMC6806544; doi:10.1186/s40168-019-0753-z)
Supplement: Supplementary file 7 — Additional file 7: Table S2. S. aureus isolates and relevant metadata. (XLSX 13 kb) [file 40168_2019_753_MOESM7_ESM.xlsx]

## Sheet: Supplementary Table 3
Supplementary Table 3: S. aureus isolates and relavant metadata
Number	Sanger ID	ENA accession	Strain name	Sample date	Sample	Sequence type (ST)	arcC	aroE	glpF	gmk	pta	tpi	yqiL	Virulence genotype
1	20759_1#20	ERR1791701	SAUR_105	2015-04-14	105_aGPA	45	10	14	8	6	10	3	2	sak chips SCIN
2	20759_1#21	ERR1791702	SAUR_111	2015-04-17	111_aGPA	45	10	14	8	6	10	3	2
3	20759_1#22	ERR1791703	SAUR_119	2015-04-24	119_inGPA	72	1	4	1	8	4	4	3	sak chips SCIN lukED
4	20759_1#23	ERR1791704	SAUR_121	2015-04-24	121_inGPA	3804	8	2	2	2	6	3	467	sak chips SCIN tst
5	20759_1#24	ERR1791705	SAUR_125	2015-05-05	125_aGPA	39	2	2	2	2	2	2	2	tst
6	20759_1#25	ERR1791706	SAUR_131	2015-05-08	131_inGPA	398	3	35	19	2	20	26	39	chips SCIN
7	20759_1#26	ERR1791707	SAUR_137	2015-05-15	137_inGPA	97	3	1	1	1	1	5	3	sak SCIN lukED
8	20759_1#27	ERR1791708	SAUR_141	2015-05-22	141_EGPA	34	8	2	2	2	6	3	2	sak SCIN
9	20759_1#28	ERR1791709	SAUR_143	2015-06-05	143_EGPA	398	3	35	19	2	20	26	39	chips SCIN
10	20759_1#29	ERR1791710	SAUR_153	2015-06-05	153_inGPA	109	3	27	1	1	1	1	10	sak chips SCIN
11	20759_1#30	ERR1791711	SAUR_157	2015-06-12	157_EGPA	Waiting on submission	12	727	1	4	12	1	3	sak SCIN lukED
12	20759_1#31	ERR1791712	SAUR_173	2015-06-23	173_HC	398	3	35	19	2	20	26	39	chips SCIN
13	20759_1#32	ERR1791713	SAUR_177	2015-06-23	177_HC	188	3	1	1	8	1	1	1	sak SCIN lukED
14	20759_1#1	ERR1791682	SAUR_21	2015-02-17	021_aGPA	398	3	35	19	2	20	26	39	chips SCIN
15	20759_1#2	ERR1791683	SAUR_21a	2015-03-13	021_inGPA_1m	398	3	35	19	2	20	26	39	chips SCIN
16	20759_1#3	ERR1791684	SAUR_23	2015-02-17	023_HHC_of_021	398	3	35	19	2	20	26	39	chips SCIN
17	20759_1#4	ERR1791685	SAUR_23a	2015-03-13	023_HHC_of_021_1m	398	3	35	19	2	20	26	39	chips SCIN
18	20759_1#6	ERR1791687	SAUR_33	2015-02-23	033_aGPA	30	2	2	2	2	6	3	2	sak chips SCIN tst
19	20759_1#7	ERR1791688	SAUR_37	2015-02-23	037_aGPA	15	13	13	1	1	12	11	13	chips SCIN lukED
20	20759_1#8	ERR1791689	SAUR_47	2015-02-27	047_inGPA	5	1	4	1	4	12	1	10	sak chips SCIN lukED
21	20759_1#9	ERR1791690	SAUR_49	2015-02-27	049_inGPA	22	7	6	1	5	8	8	6
22	20759_1#10	ERR1791691	SAUR_51	2015-02-27	051_aGPA	34	8	2	2	2	6	3	2	sak chips SCIN tst
23	20759_1#11	ERR1791692	SAUR_63	2015-03-06	063_aGPA	425	18	33	6	20	7	50	48	lukED
24	20759_1#12	ERR1791693	SAUR_63a	2015-04-24	063_inGPA_1m	425	18	33	6	20	7	50	48	lukED
25	20759_1#13	ERR1791694	SAUR_67	2015-03-09	067_inGPA	45	10	14	8	6	10	3	2	sak chips SCIN
26	20759_1#14	ERR1791695	SAUR_69	2015-03-13	069_inGPA	123	6	5	6	2	7	17	19	sak SCIN lukED
27	20759_1#15	ERR1791696	SAUR_73	2015-03-13	073_inGPA	15	13	13	1	1	12	11	13	chips SCIN lukED
28	20759_1#16	ERR1791697	SAUR_81	2015-03-27	081_inGPA	182	18	18	6	2	13	15	18	sak chips SCIN
29	20759_1#17	ERR1791698	SAUR_87	2015-03-27	087_inGPA	Waiting on submission	577	3	1	1	4	4	3	sak chips SCIN lukED
30	20759_1#18	ERR1791699	SAUR_95	2015-04-07	095_inGPA	45	10	14	8	6	10	3	2	sak chips SCIN
31	20759_1#19	ERR1791700	SAUR_99	2015-04-14	099_inGPA	15	13	13	1	1	12	11	13	chips SCIN lukED
