# Supplementary material for: The composition and functional protein subsystems of the human nasal microbiome in granulomatosis with polyangiitis: a pilot study
Source: Microbiome. 2019 Oct 22;7:137. doi: 10.1186/s40168-019-0753-z (PMC6806544; doi:10.1186/s40168-019-0753-z)
Supplement: Supplementary file 9 — Additional file 9: Table S4. Positive MEGAN hits for shot gun sequenced Staphylococcus species. (XLSX 10 kb) [file 40168_2019_753_MOESM9_ESM.xlsx]

## Sheet: Sheet1
	Supplementary Table 5. Positive MEGAN hits for shot gun sequenced Staphylococcus species
	Total 198 taxa with min 0.001% and max 32.13 % abundance
	7 species in the top 1% abundance group
	Staphylococcus epidermidis	32.1281
	Staphylococcus aureus	31.6772
	Staphylococcus pseudintermedius	13.0106
	Staphylococcus haemolyticus	5.23538
	Staphylococcus lugdunensis	3.04032
	Staphylococcus pettenkoferi	2.35481
	Staphylococcus capitis	1.16173
		0.8861
	32 species are in the top 0.1% abundance groups
	Staphylococcus epidermidis	32.1281
	Staphylococcus aureus	31.6772
	Staphylococcus pseudintermedius	13.0106
	Staphylococcus haemolyticus	5.23538
	Staphylococcus lugdunensis	3.04032
	Staphylococcus pettenkoferi	2.35481
	Staphylococcus capitis	1.16173
	Staphylococcus caprae	0.91604
	Staphylococcus pasteuri	0.896829
	Staphylococcus saprophyticus	0.861441
	Staphylococcus hominis	0.847286
	Staphylococcus delphini	0.705735
	Staphylococcus warneri	0.615749
	Staphylococcus sp. DORA_6_22	0.483297
	Staphylococcus sp. HMSC036D05	0.370056
	Staphylococcus sp. URHA0057	0.328601
	Staphylococcus sp. HMSC071G07	0.29018
	Staphylococcus argenteus	0.254793
	Staphylococcus sp. E463	0.243671
	Staphylococcus sp. HMSC062D04	0.223449
	Staphylococcus sp. HMSC62A08	0.188061
	Staphylococcus sp. AOAB	0.18705
	Staphylococcus sp. HMSC062B11	0.175928
	Staphylococcus sp. HMSC072H01	0.175928
	Staphylococcus equorum	0.163795
	Staphylococcus sp. HMSC13A10	0.163795
	Staphylococcus sp. HMSC074D07	0.145596
	Staphylococcus sp. HMSC065D05	0.139529
	Staphylococcus intermedius	0.133463
	Staphylococcus sp. HMSC055B03	0.131441
	Staphylococcus sp. HMSC077D08	0.131441
	Staphylococcus sp. HMSC034A07	0.11223
		0.9749
	Meta SPAdes assembled scaffolds were DIAMOND blastx search against the NCBI non-redundant nucleotide database and subsequently analysed my MEGAN. The number of Staphylococcus hits were extracted from the MEGAN files and the proportion of the top 32 species with a minimum abundance of 0.1% are presented.
